# Supplementary material for: Swimming in Light: A Large-Scale Computational Analysis of the Metabolism of Dinoroseobacter shibae
Source: PLoS Comput Biol. 2013 Oct 3;9(10):e1003224. doi: 10.1371/journal.pcbi.1003224 (PMC3789786; doi:10.1371/journal.pcbi.1003224)
Supplement: Dataset S1 — Complete list of all genes covered in iDsh827. (XLS) [file pcbi.1003224.s001.xls]

## Sheet: Supplementary File 1
locus_tag	gi	plasmid	ec	gene_name	relevance
Dshi_0001	159042557	chromosome	1.4.1.13	gltD	21
Dshi_0006	159042562	chromosome	2.3.1.117	dapD	21
Dshi_0012	159042568	chromosome	3.5.1.18	dapE1	21
Dshi_0028	159042584	chromosome	3.2.2.-	mutY	13
Dshi_0031	159042587	chromosome	2.7.1.130	lpxK	21
Dshi_0032	159042588	chromosome	2.-.-.-	kdtA	13
Dshi_0039	159042595	chromosome	3.5.4.25	ribA	19
Dshi_0054	159042610	chromosome	2.5.1.18	gst2	16
Dshi_0057	159042613	chromosome	6.1.1.4	leuS	15
Dshi_0060	159042616	chromosome	2.6.1.17		4
Dshi_0062	159042618	chromosome	1.14.13.-	ubiH	13
Dshi_0063	159042619	chromosome	3.1.3.25	suhB2	18
Dshi_0067	159042623	chromosome	4.2.1.17	caiD	9
Dshi_0071	159042627	chromosome	2.3.2.2	ggt1	17
Dshi_0074	159042630	chromosome	2.3.1.9	thlA	17
Dshi_0079	159042635	chromosome	2.3.1.-		13
Dshi_0081	159042637	chromosome	1.1.1.85	imdh	21
Dshi_0083	159042639	chromosome	4.2.1.33	leuD	19
Dshi_0085	159042641	chromosome	4.2.1.33	ipmi1	21
Dshi_0089	159042645	chromosome	5.4.2.1	ipgm	21
Dshi_0092	159042648	chromosome	3.6.1.-		13
Dshi_0125	159042681	chromosome	1.3.1.34	fadH	17
Dshi_0129	159042685	chromosome	4.2.1.9	ilvD1	21
Dshi_0131	159042687	chromosome	6.4.1.2	accD	21
Dshi_0132	159042688	chromosome	6.3.2.17	folC	17
Dshi_0134	159042690	chromosome	4.2.1.96	pcd	17
Dshi_0142	159042698	chromosome	2.4.1.129	mrcB	10
Dshi_0145	159042701	chromosome	2.6.1.57		13
Dshi_0146	159042702	chromosome	2.8.1.2	sseA	17
Dshi_0149	159042705	chromosome	4.2.1.52	dapA	21
Dshi_0150	159042706	chromosome	3.2.1.-		13
Dshi_0157	159042713	chromosome	2.5.1.17	cobA2	18
Dshi_0158	159042714	chromosome	6.6.1.2	cobN	21
Dshi_0165	159042721	chromosome	6.3.1.10	cobD	17
Dshi_0166	159042722	chromosome	4.1.1.81	cobC	12
Dshi_0171	159042727	chromosome	4.99.1.3	cbiX2	18
Dshi_0172	159042728	chromosome	5.4.1.2	cobH	19
Dshi_0173	159042729	chromosome	2.1.1.132	cobL	20
Dshi_0174	159042730	chromosome	2.1.1.130	cobI	10
Dshi_0175	159042731	chromosome	1.14.13.83	cbiG	6
Dshi_0175	159042731	chromosome	2.1.1.131	cbiG	11
Dshi_0176	159042732	chromosome	2.1.1.133	cobM	19
Dshi_0178	159042734	chromosome	4.4.1.8		13
Dshi_0181	159042737	chromosome	2.1.2.9	fmt	21
Dshi_0185	159042741	chromosome	2.7.7.41	cdsA2	17
Dshi_0188	159042744	chromosome	1.17.1.2	ispH	21
Dshi_0192	159042748	chromosome	2.7.6.3	hppk	17
Dshi_0194	159042750	chromosome	2.7.6.5	relA	21
Dshi_0196	159042752	chromosome	2.6.99.2	pdxJ	20
Dshi_0198	159042754	chromosome	2.7.8.7	acpS	17
Dshi_0213	159042769	chromosome	4.1.1.49	pckA	21
Dshi_0214	159042770	chromosome	1.1.1.157	hbdA	20
Dshi_0228	159042784	chromosome	2.7.1.40	pykA	21
Dshi_0235	159042791	chromosome	6.1.1.20	pheS	21
Dshi_0237	159042793	chromosome	6.1.1.20	pheT	21
Dshi_0239	159042795	chromosome	1.4.1.21	nadX	17
Dshi_0240	159042796	chromosome	2.5.1.18	gst3	16
Dshi_0244	159042800	chromosome	1.4.1.1	adh	17
Dshi_0253	159042809	chromosome	6.2.1.12		13
Dshi_0273	159042829	chromosome	3.6.5.3	fusA	10
Dshi_0274	159042830	chromosome	3.6.5.3	tufA1	10
Dshi_0306	159042862	chromosome	2.7.4.3	adk	19
Dshi_0315	159042871	chromosome	5.4.99.12	rluC	10
Dshi_0316	159042872	chromosome	3.1.3.18	gph	16
Dshi_0324	159042880	chromosome	2.7.2.8	argB	21
Dshi_0325	159042881	chromosome	1.1.1.100	fabG3	10
Dshi_0332	159042888	chromosome	3.1.26.5	rnpA	16
Dshi_0335	159042891	chromosome	1.16.1.1	merA	17
Dshi_0347	159042903	chromosome	1.16.8.1	bluB	10
Dshi_0349	159042905	chromosome	5.4.99.5	pheA1	15
Dshi_0358	159042914	chromosome	3.5.4.10	purH	13
Dshi_0358	159042914	chromosome	2.1.2.3	purH	21
Dshi_0373	159042929	chromosome	6.2.1.3	fadD3	17
Dshi_0382	159042938	chromosome	6.2.1.30	paaK	17
Dshi_0386	159042942	chromosome	3.5.3.8	hutG	10
Dshi_0428	159042983	chromosome	2.3.1.-	phaC	13
Dshi_0432	159042987	chromosome	3.5.3.6	arcA	21
Dshi_0433	159042988	chromosome	2.1.3.3	arcB	21
Dshi_0434	159042989	chromosome	2.7.2.2	arcC	19
Dshi_0435	159042990	chromosome	3.6.3.14	atpD1	21
Dshi_0436	159042991	chromosome	3.6.3.14	atpC2	14
Dshi_0439	159042994	chromosome	3.6.3.14	atpB2	15
Dshi_0440	159042995	chromosome	3.6.3.14	atpE1	15
Dshi_0441	159042996	chromosome	3.6.3.14	atpF1	14
Dshi_0442	159042997	chromosome	3.6.3.14	atpA2	21
Dshi_0443	159042998	chromosome	3.6.3.14	atpG1	17
Dshi_0452	159043007	chromosome	1.3.3.11	pqqC	20
Dshi_0473	159043028	chromosome	1.1.1.284		14
Dshi_0474	159043029	chromosome	3.1.2.12		20
Dshi_0504	159043059	chromosome	1.2.1.2	fdnG	17
Dshi_0505	159043060	chromosome	1.2.1.2	fdnH	16
Dshi_0506	159043061	chromosome	1.2.1.2	fdnI	17
Dshi_0520	159043073	chromosome	2.7.1.100	mtnK	19
Dshi_0521	159043074	chromosome	5.3.1.23	mtnA	21
Dshi_0523	159043076	chromosome	4.1.2.17	fucA	19
Dshi_0534	159043087	chromosome	1.2.4.1	pdhA2	17
Dshi_0535	159043088	chromosome	1.2.4.1	pdhB1	17
Dshi_0536	159043089	chromosome	2.3.1.12	pdhC2	18
Dshi_0541	159043094	chromosome	1.3.99.22	hemN1	20
Dshi_0546	159043099	chromosome	3.6.3.20	ugpC2	13
Dshi_0551	159043104	chromosome	1.1.1.9	xylD	21
Dshi_0552	159043105	chromosome	5.3.1.27		9
Dshi_0554	159043107	chromosome	1.1.1.56	rbtD	20
Dshi_0555	159043108	chromosome	2.7.1.16	araB	10
Dshi_0555	159043108	chromosome	2.7.1.47	araB	4
Dshi_0577	159043130	chromosome	1.2.1.3	aldH2	17
Dshi_0583	159043136	chromosome	2.5.1.55	kdsA	20
Dshi_0590	159043143	chromosome	1.1.1.79		10
Dshi_0592	159043145	chromosome	2.4.1.129	ftsI1	10
Dshi_0596	159043149	chromosome	2.3.3.13	leuA	21
Dshi_0601	159043154	chromosome	6.3.1.5	nadE	11
Dshi_0601	159043154	chromosome	6.3.5.1	nadE	14
Dshi_0615	159043168	chromosome	4.1.1.23	pyrF	18
Dshi_0620	159043173	chromosome	1.1.1.100	fabG2	10
Dshi_0628	159043181	chromosome	6.3.2.12		2
Dshi_0630	159043183	chromosome	1.1.5.3	glpD	17
Dshi_0632	159043185	chromosome	2.7.2.1	ackA	20
Dshi_0633	159043186	chromosome	2.3.1.8	pta2	12
Dshi_0651	159043204	chromosome	3.6.1.22		12
Dshi_0653	159043206	chromosome	4.2.1.51	pheA2	17
Dshi_0659	159043212	chromosome	1.3.99.22	hemN2	21
Dshi_0661	159043214	chromosome	1.9.3.1	fixN	21
Dshi_0662	159043215	chromosome	1.9.3.1	fixO	17
Dshi_0663	159043216	chromosome	1.9.3.1	fixQ	14
Dshi_0664	159043217	chromosome	1.9.3.1	fixP	17
Dshi_0667	159043220	chromosome	3.6.3.4	fixI	11
Dshi_0669	159043222	chromosome	3.4.16.4	dacC2	17
Dshi_0674	159043227	chromosome	1.3.3.3	hemF	19
Dshi_0675	159043228	chromosome	2.3.2.2	ggt2	17
Dshi_0680	159043233	chromosome	4.1.1.21	purK	10
Dshi_0688	159043241	chromosome	1.3.99.1		12
Dshi_0689	159043242	chromosome	4.1.3.30	prpB	12
Dshi_0690	159043243	chromosome	3.3.2.1	entB	9
Dshi_0695	159043248	chromosome	4.2.1.33	leuC	21
Dshi_0696	159043249	chromosome	4.2.1.33	leuD_2	17
Dshi_0713	159043265	chromosome	3.1.1.75		10
Dshi_0718	159043270	chromosome	6.4.1.3	pccB	17
Dshi_0723	159043275	chromosome	6.4.1.3	pccA	21
Dshi_0726	159043278	chromosome	5.4.99.2	bhbA	21
Dshi_0728	159043280	chromosome	1.6.99.5	mnhA	10
Dshi_0731	159043283	chromosome	1.6.99.5	mnhD	10
Dshi_0739	159043291	chromosome	3.6.1.40	ppx	13
Dshi_0744	159043296	chromosome	6.1.1.15	proS	21
Dshi_0748	159043300	chromosome	3.6.3.-	lolD	13
Dshi_0762	159043314	chromosome	2.6.1.-	aspC
Dshi_0762	159043314	chromosome	2.6.1.1	aspC	21
Dshi_0767	159043319	chromosome	4.4.1.5		15
Dshi_0768	159043320	chromosome	2.1.1.148	thyX	21
Dshi_0775	159043327	chromosome	1.1.1.93	ttuC	17
Dshi_0775	159043327	chromosome	4.1.1.73	ttuC	17
Dshi_0775	159043327	chromosome	1.1.1.83	ttuC	15
Dshi_0777	159043329	chromosome	6.1.1.3	thrS	21
Dshi_0787	159043339	chromosome	2.7.8.26	cobS1	14
Dshi_0788	159043340	chromosome	2.4.2.21	cobT	20
Dshi_0793	159043345	chromosome	2.5.1.49	metB2	17
Dshi_0794	159043346	chromosome	4.2.1.19	hisB	19
Dshi_0795	159043347	chromosome	2.4.2.-	hisH	13
Dshi_0796	159043348	chromosome	2.1.3.3	argF	14
Dshi_0798	159043350	chromosome	2.6.1.11	argD	21
Dshi_0805	159043357	chromosome	2.3.3.15		21
Dshi_0815	159043367	chromosome	4.4.1.5		9
Dshi_0821	159043373	chromosome	2.1.2.1	glyA	21
Dshi_0822	159043374	chromosome	2.7.1.23	ppnK	20
Dshi_0825	159043377	chromosome	6.2.1.17		11
Dshi_0827	159043379	chromosome	3.5.4.5	cdd	16
Dshi_0828	159043380	chromosome	2.4.2.4	deoA	20
Dshi_0829	159043381	chromosome	5.4.2.7	deoB	20
Dshi_0830	159043382	chromosome	3.5.4.4	add	18
Dshi_0831	159043383	chromosome	2.4.2.9	upp	19
Dshi_0833	159043385	chromosome	6.2.1.-	DmdB	6
Dshi_0835	159043387	chromosome	5.1.2.3	fadJ	17
Dshi_0837	159043389	chromosome	2.5.1.18		9
Dshi_0839	159043391	chromosome	1.3.8.-	DmdC
Dshi_0849	159043401	chromosome	3.1.3.5		20
Dshi_0850	159043402	chromosome	3.6.4.13	deaD	11
Dshi_0853	159043405	chromosome	6.2.1.3	fadD2	10
Dshi_0877	159043429	chromosome	3.1.3.26		10
Dshi_0887	159043439	chromosome	2.6.1.45	sgaA2	20
Dshi_0888	159043440	chromosome	4.3.1.19		17
Dshi_0890	159043442	chromosome	4.3.1.12		19
Dshi_0891	159043443	chromosome	2.5.1.47	cysK	19
Dshi_0908	159043460	chromosome	3.5.99.2		9
Dshi_0911	159043463	chromosome	2.5.1.3	thiE	18
Dshi_0914	159043466	chromosome	1.4.3.19	thiO	17
Dshi_0915	159043467	chromosome	2.7.4.7	thiD	16
Dshi_0922	159043474	chromosome	2.7.4.9	tmk	19
Dshi_0923	159043475	chromosome	3.4.16.4	dacC1	17
Dshi_0931	159043483	chromosome	1.1.1.1	adhA	20
Dshi_0947	159043499	chromosome	3.1.1.29	pthA	19
Dshi_0948	159043500	chromosome	1.1.2.3	lldD2	17
Dshi_0952	159043504	chromosome	4.2.1.20	trpA	20
Dshi_0961	159043513	chromosome	1.13.11.1		9
Dshi_0969	159043518	chromosome	1.1.1.67	mtlK	21
Dshi_0977	159043526	chromosome	2.5.1.7	murA	21
Dshi_0979	159043528	chromosome	1.1.1.23	hisD	21
Dshi_0996	159043545	chromosome	1.6.99.5		10
Dshi_0998	159043547	chromosome	3.5.4.2	ade	21
Dshi_1000	159043549	chromosome	6.2.1.3	fadD4	21
Dshi_1001	159043550	chromosome	1.1.1.95	serA2	17
Dshi_1002	159043551	chromosome	2.5.1.48	metB1	19
Dshi_1007	159043556	chromosome	3.1.1.24	catD	10
Dshi_1008	159043557	chromosome	1.3.1.9	fabI1	19
Dshi_1009	159043558	chromosome	2.3.1.41	fabB	17
Dshi_1010	159043559	chromosome	4.2.1.60	fabA	18
Dshi_1010	159043559	chromosome	4.2.1.61	fabA
Dshi_1010	159043559	chromosome	4.2.1.58	fabA
Dshi_1012	159043561	chromosome	2.5.1.6	metK	21
Dshi_1021	159043570	chromosome	2.1.1.33	trmB	20
Dshi_1022	159043571	chromosome	2.5.1.19	aroA	21
Dshi_1023	159043572	chromosome	2.7.4.14	cmk	19
Dshi_1029	159043578	chromosome	5.3.1.24	trpF	18
Dshi_1031	159043580	chromosome	4.2.1.20	trpB	21
Dshi_1048	159043597	chromosome	4.2.1.17		9
Dshi_1051	159043600	chromosome	4.2.1.79		10
Dshi_1067	159043616	chromosome	1.15.1.1	sod	19
Dshi_1073	159043622	chromosome	2.1.1.13		17
Dshi_1074	159043623	chromosome	2.1.1.13		11
Dshi_1076	159043625	chromosome	6.3.2.6	purC	21
Dshi_1078	159043627	chromosome	1.1.1.1		17
Dshi_1079	159043628	chromosome	6.3.5.3	purQ	20
Dshi_1082	159043631	chromosome	2.3.2.8	ate	21
Dshi_1092	159043641	chromosome	4.1.3.1		0
Dshi_1095	159043644	chromosome	1.2.1.3		21
Dshi_1099	159043648	chromosome	1.8.4.11	msrA2	18
Dshi_1100	159043649	chromosome	2.1.1.-	prmA	13
Dshi_1107	159043656	chromosome	3.1.2.-		13
Dshi_1114	159043663	chromosome	6.3.4.-	tilS	13
Dshi_1134	159043683	chromosome	2.8.3.5	3-oxoacid CoA-transferase subunit B	18
Dshi_1136	159043685	chromosome	2.8.3.5	3-oxoacid CoA-transferase subunit A	20
Dshi_1140	159043689	chromosome	1.9.3.1	ctaC	13
Dshi_1141	159043690	chromosome	2.5.1.-	ctaB	13
Dshi_1144	159043693	chromosome	1.9.3.1	ctaE	20
Dshi_1146	159043695	chromosome	4.2.3.1	thrC	21
Dshi_1150	159043699	chromosome	1.18.1.2		17
Dshi_1152	159043701	chromosome	1.8.4.8	cysH	19
Dshi_1153	159043702	chromosome	1.8.1.2	cysI	11
Dshi_1155	159043704	chromosome	1.3.1.76		17
Dshi_1158	159043707	chromosome	3.2.2.1	rih	11
Dshi_1161	159043710	chromosome	3.5.1.32		17
Dshi_1169	159043718	chromosome	3.5.1.28	amiC	17
Dshi_1171	159043720	chromosome	2.4.1.129		10
Dshi_1180	159043729	chromosome	5.-.-.-	queA	13
Dshi_1182	159043731	chromosome	2.3.1.37	hemA2	21
Dshi_1184	159043733	chromosome	1.17.7.1	ispG	21
Dshi_1186	159043735	chromosome	1.1.1.262	pdxA	20
Dshi_1199	159043748	chromosome	3.1.3.25	suhB1	19
Dshi_1207	159043756	chromosome	6.3.5.6	gatB	11
Dshi_1210	159043759	chromosome	1.2.99.2	coxM	19
Dshi_1211	159043760	chromosome	1.2.99.2	coxS	18
Dshi_1212	159043761	chromosome	1.2.99.2	coxL2	21
Dshi_1216	159043765	chromosome	1.1.1.169	panE	20
Dshi_1223	159043772	chromosome	3.4.11.2	pepN	21
Dshi_1227	159043776	chromosome	2.3.3.9	glcB	21
Dshi_1230	159043779	chromosome	3.7.1.3		20
Dshi_1233	159043782	chromosome	1.6.1.2	pntA	17
Dshi_1234	159043783	chromosome	1.6.1.2	pntB	17
Dshi_1235	159043784	chromosome	2.7.1.17	xylB1	19
Dshi_1236	159043785	chromosome	1.8.5.3	dmsC
Dshi_1237	159043786	chromosome	1.8.5.3	dmsB
Dshi_1238	159043787	chromosome	1.8.5.3	dmsA
Dshi_1239	159043788	chromosome	3.2.1.23	lacZ	21
Dshi_1241	159043790	chromosome	4.1.2.21	dgoA	16
Dshi_1242	159043791	chromosome	2.7.1.58	dgoK	17
Dshi_1244	159043793	chromosome	4.2.1.9	ilvD2	17
Dshi_1245	159043794	chromosome	3.2.1.22	melA	21
Dshi_1254	159043803	chromosome	1.2.1.12		20
Dshi_1259	159043808	chromosome	3.6.3.4		15
Dshi_1265	159043814	chromosome	1.1.1.18	idhA	19
Dshi_1266	159043815	chromosome	4.1.2.13	fbaA	18
Dshi_1268	159043817	chromosome	2.7.1.92	iolC	13
Dshi_1269	159043818	chromosome	3.7.1.-	iolD	7
Dshi_1271	159043820	chromosome	4.2.1.44		12
Dshi_1273	159043822	chromosome	5.1.1.1		10
Dshi_1282	159043831	chromosome	1.2.1.2	fdhA	17
Dshi_1283	159043832	chromosome	6.3.4.3	fhs	21
Dshi_1285	159043834	chromosome	1.5.1.5	folD	21
Dshi_1288	159043837	chromosome	3.5.1.32		17
Dshi_1289	159043838	chromosome	6.3.5.2		18
Dshi_1293	159043842	chromosome	2.6.1.16	glmS	21
Dshi_1294	159043843	chromosome	2.7.7.23	glmU	21
Dshi_1295	159043844	chromosome	3.1.3.18		17
Dshi_1300	159043849	chromosome	6.4.1.4	mccB	17
Dshi_1301	159043850	chromosome	6.4.1.4	mccA	17
Dshi_1302	159043851	chromosome	2.5.1.18		10
Dshi_1303	159043852	chromosome	4.1.3.4	mvaB	18
Dshi_1304	159043853	chromosome	4.2.1.18	mvaA	16
Dshi_1307	159043856	chromosome	1.6.5.3	nuoA	16
Dshi_1309	159043858	chromosome	1.6.99.5	nuoC	14
Dshi_1313	159043862	chromosome	1.6.5.3	nuoE	19
Dshi_1320	159043869	chromosome	1.6.99.5	nuoG	14
Dshi_1321	159043870	chromosome	1.6.99.5	nuoH	14
Dshi_1329	159043878	chromosome	1.6.99.5	nuoN	14
Dshi_1331	159043880	chromosome	2.7.1.33		15
Dshi_1339	159043888	chromosome	1.1.1.100		10
Dshi_1341	159043890	chromosome	3.6.3.30		11
Dshi_1350	159043899	chromosome	2.7.4.6	ndk	17
Dshi_1361	159043910	chromosome	1.1.2.4	dld1	17
Dshi_1362	159043911	chromosome	1.4.1.13		11
Dshi_1363	159043912	chromosome	1.3.1.2	pyrD1	10
Dshi_1366	159043915	chromosome	2.6.1.18		17
Dshi_1367	159043916	chromosome	3.5.1.6	amaB	4
Dshi_1370	159043919	chromosome	3.5.2.2	dht	21
Dshi_1375	159043924	chromosome	4.1.1.17		17
Dshi_1376	159043925	chromosome	3.5.2.10		17
Dshi_1378	159043927	chromosome	1.6.5.2		10
Dshi_1379	159043928	chromosome	1.6.5.2		10
Dshi_1381	159043930	chromosome	3.5.4.1		10
Dshi_1394	159043943	chromosome	2.3.2.6	aat	21
Dshi_1399	159043948	chromosome	6.2.1.1	acsA	21
Dshi_1426	159043975	chromosome	4.2.1.2		17
Dshi_1427	159043976	chromosome	2.8.3.10	citF	17
Dshi_1428	159043977	chromosome	1.1.1.59	DddA
Dshi_1429	159043978	chromosome	1.1.1.100	fabG	10
Dshi_1430	159043979	chromosome	1.2.1.3		14
Dshi_1439	159043988	chromosome	4.4.1.15		13
Dshi_1467	159044016	chromosome	2.7.2.11	proB	21
Dshi_1469	159044018	chromosome	1.2.1.41	proA	21
Dshi_1473	159044022	chromosome	2.3.1.51		9
Dshi_1474	159044023	chromosome	6.1.1.-		13
Dshi_1492	159044041	chromosome	2.5.1.75	miaA	21
Dshi_1493	159044042	chromosome	2.7.4.22	pyrH	14
Dshi_1495	159044044	chromosome	2.5.1.31	uppS	19
Dshi_1496	159044045	chromosome	2.7.7.41	cdsA1	16
Dshi_1497	159044046	chromosome	1.1.1.267	dxr	21
Dshi_1501	159044050	chromosome	4.2.1.-	fabZ	13
Dshi_1501	159044050	chromosome	4.2.1.59	fabZ
Dshi_1502	159044051	chromosome	2.3.1.129	lpxA	20
Dshi_1504	159044053	chromosome	2.4.1.182	lpxB	20
Dshi_1506	159044055	chromosome	2.1.1.61	mnmA	10
Dshi_1510	159044059	chromosome	3.6.4.12	recG	11
Dshi_1514	159044063	chromosome	2.5.1.3		10
Dshi_1515	159044064	chromosome	3.5.4.19	hisI	17
Dshi_1526	159044075	chromosome	2.5.1.54	aroH	17
Dshi_1529	159044078	chromosome	2.7.4.8	gmk	20
Dshi_1536	159044085	chromosome	3.6.3.27	pstB	21
Dshi_1544	159044093	chromosome	1.1.1.30		13
Dshi_1551	159044100	chromosome	4.2.1.10		19
Dshi_1554	159044103	chromosome	5.3.1.22		11
Dshi_1563	159044112	chromosome	4.2.1.24	hemB1	20
Dshi_1577	159044126	chromosome	2.7.7.60	ispDF	21
Dshi_1577	159044126	chromosome	4.6.1.12	ispDF	13
Dshi_1578	159044127	chromosome	3.1.3.27		10
Dshi_1581	159044130	chromosome	2.4.2.8	hpt	18
Dshi_1586	159044135	chromosome	2.1.1.-	mttb	13
Dshi_1587	159044136	chromosome	6.3.5.2	guaA	21
Dshi_1593	159044142	chromosome	2.3.1.46	metA	21
Dshi_1604	159044153	chromosome	4.2.1.17		10
Dshi_1608	159044157	chromosome	4.2.3.4	aroB	21
Dshi_1609	159044158	chromosome	2.7.1.71	aroK	18
Dshi_1618	159044167	chromosome	2.3.1.191	lpxD
Dshi_1618	159044167	chromosome	2.3.1.-	lpxD	13
Dshi_1621	159044170	chromosome	2.7.1.11		17
Dshi_1642	159044191	chromosome	6.1.1.7	alaS	21
Dshi_1646	159044195	chromosome	1.1.1.205	guaB	17
Dshi_1647	159044196	chromosome	4.1.2.-	hpcH	13
Dshi_1648	159044197	chromosome	3.6.3.19	malK	13
Dshi_1649	159044198	chromosome	3.2.1.20		15
Dshi_1654	159044203	chromosome	3.2.1.21	bglA	20
Dshi_1655	159044204	chromosome	2.7.1.2	glk	18
Dshi_1667	159044216	chromosome	1.7.1.4	nasD	21
Dshi_1668	159044217	chromosome	1.7.1.4	nasE	15
Dshi_1669	159044218	chromosome	1.7.99.4	nasA	17
Dshi_1671	159044220	chromosome	1.3.1.76	cysG	17
Dshi_1671	159044220	chromosome	4.99.1.4	cysG	7
Dshi_1675	159044224	chromosome	1.5.1.20		10
Dshi_1677	159044226	chromosome	2.1.1.13		11
Dshi_1682	159044231	chromosome	5.3.1.9	pgi	21
Dshi_1683	159044232	chromosome	3.1.1.31		17
Dshi_1684	159044233	chromosome	1.1.1.49	zwf	21
Dshi_1690	159044239	chromosome	1.3.1.54	cobK	19
Dshi_1691	159044240	chromosome	2.1.1.195	cbiD
Dshi_1692	159044241	chromosome	2.1.1.107	cobA1	20
Dshi_1693	159044242	chromosome	6.3.5.9	cobB	10
Dshi_1696	159044245	chromosome	2.3.3.13		11
Dshi_1698	159044247	chromosome	6.1.1.16	cysS	21
Dshi_1702	159044251	chromosome	3.6.3.-	znuC	13
Dshi_1713	159044262	chromosome	6.3.5.3	purL	21
Dshi_1720	159044269	chromosome	2.3.1.180	fabH	15
Dshi_1723	159044272	chromosome	3.5.4.13		18
Dshi_1725	159044274	chromosome	1.5.1.3		1
Dshi_1726	159044275	chromosome	3.2.1.52	nagZ	17
Dshi_1728	159044277	chromosome	6.1.1.19	argS	21
Dshi_1729	159044278	chromosome	3.1.5.1		11
Dshi_1732	159044281	chromosome	2.1.1.-	hemK	13
Dshi_1735	159044284	chromosome	3.5.3.11	speB	20
Dshi_1738	159044287	chromosome	2.2.1.1	tktA	21
Dshi_1740	159044289	chromosome	1.2.1.12	gap2	21
Dshi_1742	159044291	chromosome	1.2.1.12	gap1	21
Dshi_1744	159044293	chromosome	2.7.7.3	coaD	19
Dshi_1747	159044296	chromosome	1.2.1.27	mmsA	17
Dshi_1747	159044296	chromosome	1.2.1.18	DddC	0
Dshi_1749	159044298	chromosome	6.3.-.-		13
Dshi_1751	159044300	chromosome	4.2.1.17		10
Dshi_1752	159044301	chromosome	1.1.1.31	mmsB	17
Dshi_1753	159044302	chromosome	4.2.1.17		19
Dshi_1759	159044308	chromosome	1.2.1.38	argC	21
Dshi_1760	159044309	chromosome	5.1.1.3	murI	21
Dshi_1762	159044311	chromosome	1.2.7.8		17
Dshi_1768	159044317	chromosome	4.1.2.14	eda	16
Dshi_1768	159044317	chromosome	4.1.3.16	eda	15
Dshi_1769	159044318	chromosome	4.2.1.12	edd	21
Dshi_1779	159044328	chromosome	2.2.1.6	ilvI	17
Dshi_1781	159044330	chromosome	2.2.1.6	ilvH	10
Dshi_1785	159044334	chromosome	1.17.4.1	nrdJ	21
Dshi_1789	159044338	chromosome	1.4.3.5	pdxH	19
Dshi_1790	159044339	chromosome	1.3.1.9	fabI2	20
Dshi_1793	159044342	chromosome	2.4.2.22	gpt	18
Dshi_1796	159044345	chromosome	4.1.3.27	trpE	21
Dshi_1798	159044347	chromosome	4.1.3.27	trpG	18
Dshi_1799	159044348	chromosome	2.4.2.18	trpD	21
Dshi_1800	159044349	chromosome	4.1.1.48	trpC	20
Dshi_1805	159044354	chromosome	6.1.1.17	gltX	21
Dshi_1806	159044355	chromosome	2.3.3.1	gltA2	21
Dshi_1811	159044360	chromosome	1.8.1.4	lpdV	21
Dshi_1820	159044369	chromosome	3.1.3.70		17
Dshi_1824	159044373	chromosome	2.4.1.7		14
Dshi_1825	159044374	chromosome	2.3.1.8	pta1	19
Dshi_1828	159044377	chromosome	2.3.3.15	xcs	21
Dshi_1839	159044388	chromosome	6.3.1.2	glnA	21
Dshi_1842	159044391	chromosome	4.3.2.2	purB	17
Dshi_1849	159044398	chromosome	4.2.1.84	nthA	18
Dshi_1851	159044400	chromosome	4.2.1.3	acnA	21
Dshi_1855	159044404	chromosome	3.6.3.41	ccmA	18
Dshi_1863	159044412	chromosome	6.1.1.11	serS	21
Dshi_1867	159044416	chromosome	6.3.1.2	glnT	21
Dshi_1885	159044434	chromosome	1.14.13.1		10
Dshi_1887	159044436	chromosome	3.1.13.5		15
Dshi_1888	159044437	chromosome	2.1.2.2	purN	16
Dshi_1889	159044438	chromosome	6.3.3.1	purM	21
Dshi_1896	159044445	chromosome	1.1.1.132	algD	20
Dshi_1897	159044446	chromosome	2.7.7.22	algA	17
Dshi_1897	159044446	chromosome	5.3.1.8	algA	13
Dshi_1900	159044449	chromosome	5.4.2.8	algC	21
Dshi_1927	159044476	chromosome	2.2.1.2	tal	19
Dshi_1933	159044481	chromosome	6.1.1.5	ileS	15
Dshi_1935	159044483	chromosome	1.8.1.9		11
Dshi_1938	159044486	chromosome	5.4.99.12	truA	21
Dshi_1943	159044491	chromosome	3.5.4.1	codA	17
Dshi_1966	159044513	chromosome	1.8.1.4	lpdA	17
Dshi_1967	159044514	chromosome	2.3.1.12	aceF	17
Dshi_1968	159044515	chromosome	1.2.4.1	aceE	21
Dshi_1976	159044522	chromosome	2.7.1.15		9
Dshi_1986	159044532	chromosome	1.1.1.42	icd	17
Dshi_1996	159044542	chromosome	5.3.1.5	xylA	21
Dshi_1997	159044543	chromosome	2.7.1.17	xylB2	17
Dshi_2005	159044551	chromosome	1.11.1.5		12
Dshi_2010	159044556	chromosome	3.6.3.28	phnC1	13
Dshi_2017	159044563	chromosome	3.6.3.20	ugpC4	20
Dshi_2020	159044566	chromosome	5.4.2.2	pgm	21
Dshi_2034	159044580	chromosome	1.1.1.23	hisD2	21
Dshi_2038	159044584	chromosome	4.2.1.7		11
Dshi_2042	159044587	chromosome	2.6.1.77	tpa	21
Dshi_2045	159044590	chromosome	2.3.3.15	xsc	14
Dshi_2055	159044599	chromosome	1.11.1.9		9
Dshi_2060	159044604	chromosome	4.2.1.3	acnB	20
Dshi_2061	159044605	chromosome	2.7.2.4	lysC	17
Dshi_2068	159044612	chromosome	2.4.2.28		13
Dshi_2070	159044614	chromosome	4.4.1.5		9
Dshi_2074	159044618	chromosome	2.4.2.7	apt	19
Dshi_2078	159044622	chromosome	5.3.1.1	tpiA	21
Dshi_2080	159044624	chromosome	1.5.1.20	metF	19
Dshi_2086	159044630	chromosome	1.2.99.2	coxL3	17
Dshi_2087	159044631	chromosome	6.1.1.9	valS	21
Dshi_2088	159044632	chromosome	2.6.1.9		12
Dshi_2090	159044634	chromosome	2.6.1.45		13
Dshi_2096	159044640	chromosome	6.3.5.10	cobQ	10
Dshi_2111	159044655	chromosome	3.5.1.10	purU	17
Dshi_2113	159044656	chromosome	2.1.2.1	glyA_2	21
Dshi_2114	159044657	chromosome	1.5.3.1		9
Dshi_2115	159044658	chromosome	1.5.3.1	soxA2	21
Dshi_2116	159044659	chromosome	1.5.3.1		10
Dshi_2117	159044660	chromosome	1.5.3.1	soxB	21
Dshi_2124	159044667	chromosome	3.5.2.10		13
Dshi_2126	159044669	chromosome	3.5.3.3		21
Dshi_2132	159044675	chromosome	2.4.2.14	purF	21
Dshi_2136	159044679	chromosome	3.1.3.5	surE	21
Dshi_2144	159044687	chromosome	4.1.2.5		19
Dshi_2145	159044688	chromosome	4.2.1.11	eno	21
Dshi_2150	159044693	chromosome	2.7.1.-	anmK	13
Dshi_2151	159044694	chromosome	6.1.1.1	tyrS	21
Dshi_2155	159044698	chromosome	2.7.2.3	pgk	21
Dshi_2156	159044699	chromosome	4.1.2.13	fda	20
Dshi_2158	159044701	chromosome	1.2.4.1	pdhA1	21
Dshi_2159	159044702	chromosome	1.2.4.1	pdhB2	21
Dshi_2160	159044703	chromosome	2.3.1.12	pdhC1	20
Dshi_2161	159044704	chromosome	2.3.1.30	cysE	17
Dshi_2180	159044723	chromosome	2.3.1.179	fabF	15
Dshi_2182	159044725	chromosome	1.1.1.100		10
Dshi_2183	159044726	chromosome	2.3.1.39	fabD	17
Dshi_2203	159044746	chromosome	2.7.7.18	nadD	11
Dshi_2206	159044749	chromosome	6.1.1.6	lysK	21
Dshi_2208	159044751	chromosome	3.4.16.4		11
Dshi_2226	159044769	chromosome	6.3.1.2		11
Dshi_2233	159044776	chromosome	2.3.1.-	phbC	13
Dshi_2234	159044777	chromosome	3.1.1.75		11
Dshi_2235	159044778	chromosome	2.1.1.14		11
Dshi_2242	159044785	chromosome	1.1.1.23	hisD3	21
Dshi_2250	159044793	chromosome	2.5.1.9	ribH	11
Dshi_2251	159044794	chromosome	3.5.4.25	ribB	11
Dshi_2251	159044794	chromosome	4.1.99.12	ribB	7
Dshi_2252	159044795	chromosome	2.5.1.9	ribC	16
Dshi_2256	159044799	chromosome	3.5.4.26	ribD	7
Dshi_2256	159044799	chromosome	1.1.1.193	ribD	17
Dshi_2262	159044805	chromosome	2.7.7.-	dnaG	13
Dshi_2264	159044807	chromosome	1.5.3.1		15
Dshi_2265	159044808	chromosome	1.5.3.1		9
Dshi_2266	159044809	chromosome	1.5.3.1		15
Dshi_2273	159044816	chromosome	1.1.1.3		17
Dshi_2274	159044817	chromosome	3.1.3.11	glpX	17
Dshi_2275	159044818	chromosome	3.1.-.-	recJ	13
Dshi_2278	159044821	chromosome	1.7.2.3	dmsA1	15
Dshi_2283	159044826	chromosome	1.14.13.92	pamO	14
Dshi_2309	159044852	chromosome	3.5.3.1		20
Dshi_2310	159044853	chromosome	4.3.1.12		21
Dshi_2311	159044854	chromosome	1.5.1.12	putA	17
Dshi_2314	159044857	chromosome	2.5.1.47		11
Dshi_2317	159044860	chromosome	2.1.1.79	cfa	17
Dshi_2320	159044863	chromosome	2.1.2.10	dmdA	18
Dshi_2332	159044875	chromosome	1.3.3.4		3
Dshi_2334	159044877	chromosome	4.2.1.2	fumC	21
Dshi_2346	159044889	chromosome	2.4.2.29	tgt	21
Dshi_2350	159044893	chromosome	2.3.1.157		2
Dshi_2365	159044908	chromosome	3.5.1.5	ureC	21
Dshi_2368	159044911	chromosome	3.5.1.5	ureB	17
Dshi_2369	159044912	chromosome	3.5.1.5	ureA	17
Dshi_2371	159044914	chromosome	3.5.2.3	pyrC2	21
Dshi_2372	159044915	chromosome	2.4.2.10	pyrE	21
Dshi_2373	159044916	chromosome	3.6.4.12	dnaB	15
Dshi_2378	159044921	chromosome	5.1.1.1	alr	21
Dshi_2381	159044924	chromosome	2.3.1.181	lipB	15
Dshi_2383	159044926	chromosome	1.9.3.1	ctaD	21
Dshi_2387	159044930	chromosome	6.3.5.5	carA	21
Dshi_2396	159044939	chromosome	1.1.1.86	ilvC	21
Dshi_2397	159044940	chromosome	5.4.2.10	glmM	21
Dshi_2398	159044941	chromosome	2.5.1.15	folP	17
Dshi_2399	159044942	chromosome	4.1.2.25		9
Dshi_2401	159044944	chromosome	2.7.9.1		21
Dshi_2402	159044945	chromosome	6.1.1.14	glyS	21
Dshi_2404	159044947	chromosome	6.1.1.14	glyQ	21
Dshi_2407	159044950	chromosome	2.5.1.18		10
Dshi_2411	159044952	chromosome	3.5.4.16		8
Dshi_2415	159044956	chromosome	3.5.1.108	lpxC
Dshi_2415	159044956	chromosome	3.5.1.-	lpxC	13
Dshi_2419	159044960	chromosome	6.3.2.4	ddl	21
Dshi_2420	159044961	chromosome	1.1.1.158	murB	21
Dshi_2422	159044963	chromosome	6.3.2.8	murC	21
Dshi_2423	159044964	chromosome	2.4.1.227	murG	21
Dshi_2436	159044977	chromosome	4.1.2.19		4
Dshi_2437	159044978	chromosome	5.3.1.14	rhaA	21
Dshi_2437	159044978	chromosome	2.7.1.5	rhaA	8
Dshi_2442	159044983	chromosome	1.2.1.4	aldH1	17
Dshi_2444	159044985	chromosome	1.1.1.262	pdxA_2	20
Dshi_2446	159044987	chromosome	4.2.1.52		11
Dshi_2451	159044992	chromosome	6.3.2.9	murD	21
Dshi_2469	159045010	chromosome	2.7.8.13	mraY	21
Dshi_2470	159045011	chromosome	6.3.2.10	murF	19
Dshi_2471	159045012	chromosome	6.3.2.13	murE	20
Dshi_2472	159045013	chromosome	2.4.1.129	ftsI2	17
Dshi_2474	159045015	chromosome	2.1.1.-	mraW	13
Dshi_2483	159045024	chromosome	3.6.4.12	uvrD	11
Dshi_2484	159045025	chromosome	1.1.2.3	lldD1	19
Dshi_2485	159045026	chromosome	6.4.1.1		21
Dshi_2489	159045030	chromosome	2.6.1.45		21
Dshi_2490	159045031	chromosome	4.1.3.34	citE1	17
Dshi_2491	159045032	chromosome	6.2.1.5	sucC2	13
Dshi_2492	159045033	chromosome	6.2.1.5	sucD2	12
Dshi_2512	159045052	chromosome	1.-.-.-	dusA	13
Dshi_2537	159045077	chromosome	4.1.1.55		11
Dshi_2566	159045106	chromosome	1.2.4.4		11
Dshi_2575	159045115	chromosome	3.6.1.31	hisE	15
Dshi_2576	159045116	chromosome	4.1.3.-	hisF	13
Dshi_2578	159045118	chromosome	5.3.1.16	hisA	19
Dshi_2612	159045152	chromosome	3.5.1.-	npdA	13
Dshi_2630	159045170	chromosome	5.1.99.1		16
Dshi_2633	159045173	chromosome	6.1.1.12	aspS	21
Dshi_2637	159045177	chromosome	1.14.13.81		10
Dshi_2639	159045179	chromosome	6.3.5.5	carB	21
Dshi_2641	159045181	chromosome	2.7.1.21	tdk	19
Dshi_2645	159045185	chromosome	1.5.1.2	proC	17
Dshi_2654	159045194	chromosome	1.8.1.9	trxB	20
Dshi_2655	159045195	chromosome	1.11.1.5	ccpA	20
Dshi_2656	159045196	chromosome	2.7.7.4		15
Dshi_2656	159045196	chromosome	2.7.1.25		6
Dshi_2658	159045198	chromosome	1.2.99.2		10
Dshi_2659	159045199	chromosome	1.2.99.2	coxL1	10
Dshi_2660	159045200	chromosome	1.2.99.2		11
Dshi_2680	159045220	chromosome	1.4.4.2	gcvP	21
Dshi_2682	159045222	chromosome	2.1.2.10	gcvT2	17
Dshi_2683	159045223	chromosome	5.1.3.3	mro	18
Dshi_2684	159045224	chromosome	3.5.2.17		10
Dshi_2685	159045225	chromosome	1.2.1.12	gap3	19
Dshi_2688	159045228	chromosome	1.10.3.-	appC	13
Dshi_2689	159045229	chromosome	1.10.3.-	cydB	13
Dshi_2691	159045231	chromosome	3.1.2.6		19
Dshi_2700	159045240	chromosome	3.8.1.2	dhlB	18
Dshi_2702	159045242	chromosome	4.3.1.19		9
Dshi_2704	159045244	chromosome	2.5.1.61	hemC	20
Dshi_2705	159045245	chromosome	4.1.1.37	hemE	21
Dshi_2707	159045247	chromosome	6.1.1.10	metG	21
Dshi_2711	159045251	chromosome	6.6.1.2	cobS2	21
Dshi_2714	159045254	chromosome	4.1.1.65	psd	19
Dshi_2719	159045259	chromosome	6.6.1.2	cobT1	21
Dshi_2728	159045268	chromosome	6.3.4.13	purD	20
Dshi_2737	159045277	chromosome	1.8.1.7	gor	20
Dshi_2738	159045278	chromosome	5.3.1.6	rpiA	21
Dshi_2739	159045279	chromosome	2.7.6.2		9
Dshi_2742	159045282	chromosome	6.3.4.4	purA	21
Dshi_2744	159045284	chromosome	6.3.4.2	pyrG	21
Dshi_2748	159045288	chromosome	6.1.1.17	gltX_2	21
Dshi_2749	159045289	chromosome	1.11.1.5		11
Dshi_2760	159045300	chromosome	3.1.3.18		10
Dshi_2771	159045311	chromosome	3.5.4.3	guaD	17
Dshi_2773	159045313	chromosome	3.5.99.3		11
Dshi_2774	159045314	chromosome	3.1.3.15		0
Dshi_2783	159045323	chromosome	3.5.1.28		9
Dshi_2785	159045325	chromosome	6.3.5.6	gatA	11
Dshi_2790	159045330	chromosome	5.4.99.12		10
Dshi_2797	159045337	chromosome	2.7.1.4		11
Dshi_2798	159045338	chromosome	3.1.-.-	dtd	13
Dshi_2829	159045369	chromosome	6.3.2.3	gshB	20
Dshi_2836	159045376	chromosome	6.1.1.2	trpS	20
Dshi_2837	159045377	chromosome	2.6.1.42		12
Dshi_2851	159045391	chromosome	2.3.1.184		3
Dshi_2854	159045394	chromosome	2.3.1.15		11
Dshi_2855	159045395	chromosome	5.4.99.2	mutB	10
Dshi_2858	159045398	chromosome	2.4.2.1	deoD	21
Dshi_2861	159045401	chromosome	1.3.99.1	sdhB	21
Dshi_2865	159045405	chromosome	1.3.5.1	sdhA	4
Dshi_2865	159045405	chromosome	1.3.99.1	sdhA	21
Dshi_2876	159045416	chromosome	1.1.1.37	mdh	21
Dshi_2878	159045418	chromosome	6.2.1.5	sucC	21
Dshi_2882	159045422	chromosome	6.2.1.5	sucD1	20
Dshi_2883	159045423	chromosome	1.2.4.2	sucA	21
Dshi_2884	159045424	chromosome	2.3.1.61	sucB	21
Dshi_2886	159045426	chromosome	1.8.1.4	lpd	21
Dshi_2887	159045427	chromosome	1.2.1.16	gabD	17
Dshi_2891	159045431	chromosome	1.1.1.100	fabG_2	10
Dshi_2896	159045436	chromosome	1.1.3.15		11
Dshi_2924	159045464	chromosome	3.6.1.1	ppaC	19
Dshi_2927	159045467	chromosome	2.7.7.2	ribF	10
Dshi_2927	159045467	chromosome	2.7.1.26	ribF	11
Dshi_2931	159045471	chromosome	2.7.6.1	prs	21
Dshi_2933	159045473	chromosome	3.6.3.14	atpC1	14
Dshi_2934	159045474	chromosome	3.6.3.14	atpD2	21
Dshi_2935	159045475	chromosome	3.6.3.14	atpG2	16
Dshi_2936	159045476	chromosome	3.6.3.14	atpA1	21
Dshi_2937	159045477	chromosome	3.6.3.14	atpH	15
Dshi_2945	159045485	chromosome	1.3.1.12	tyrC	17
Dshi_2946	159045486	chromosome	2.6.1.9	hisC	21
Dshi_2947	159045487	chromosome	2.5.1.44	hss	21
Dshi_2949	159045489	chromosome	1.17.4.1		11
Dshi_2951	159045491	chromosome	2.5.1.47		11
Dshi_2952	159045492	chromosome	6.3.2.1	panC	21
Dshi_2953	159045493	chromosome	2.4.2.17	hisG	12
Dshi_2955	159045495	chromosome	6.1.1.21	hisS	21
Dshi_2958	159045498	chromosome	1.17.1.4	xghB	17
Dshi_2959	159045499	chromosome	1.17.1.4	xdhA	17
Dshi_2960	159045500	chromosome	1.17.1.4	xdhC	9
Dshi_2966	159045506	chromosome	2.1.2.11	panB	20
Dshi_2970	159045510	chromosome	1.1.1.26	gyaR	19
Dshi_2975	159045515	chromosome	3.6.1.23	dut	17
Dshi_2976	159045516	chromosome	6.3.2.5	coaBC	13
Dshi_2976	159045516	chromosome	4.1.1.36	coaBC	17
Dshi_2979	159045519	chromosome	2.7.7.62	cobU	9
Dshi_2980	159045520	chromosome	3.1.3.73		2
Dshi_2992	159045532	chromosome	3.8.1.3	dehH	19
Dshi_2999	159045539	chromosome	6.2.1.3	fadD1	10
Dshi_3000	159045540	chromosome	4.1.1.9	mcd	18
Dshi_3006	159045546	chromosome	5.1.3.1	rpe	19
Dshi_3014	159045554	chromosome	1.14.11.18		11
Dshi_3016	159045556	chromosome	4.1.2.4	deoC	20
Dshi_3017	159045557	chromosome	1.2.1.3	ald	20
Dshi_3020	159045560	chromosome	3.5.1.18	dapE2	18
Dshi_3021	159045561	chromosome	1.2.1.3	puuC	11
Dshi_3027	159045567	chromosome	3.6.3.14	atpF2	14
Dshi_3028	159045568	chromosome	3.6.3.14	atpX	14
Dshi_3029	159045569	chromosome	3.6.3.14	atpE2	14
Dshi_3030	159045570	chromosome	3.6.3.14	atpB1	15
Dshi_3033	159045573	chromosome	2.1.1.-	rsmB1	13
Dshi_3040	159045580	chromosome	1.3.1.26	dapB	21
Dshi_3042	159045582	chromosome	5.4.99.12	truB	13
Dshi_3046	159045586	chromosome	1.1.1.81	ttuD	19
Dshi_3047	159045587	chromosome	1.1.1.60	glxR	10
Dshi_3050	159045590	chromosome	4.1.3.6	citE2	10
Dshi_3054	159045594	chromosome	2.3.1.51		9
Dshi_3059	159045599	chromosome	4.1.1.20	lysA	17
Dshi_3062	159045602	chromosome	4.3.2.1	argH	21
Dshi_3066	159045606	chromosome	2.3.1.9	atoB	21
Dshi_3067	159045607	chromosome	1.1.1.36	fabG1	20
Dshi_3072	159045612	chromosome	2.5.1.1	ispB	4
Dshi_3073	159045613	chromosome	2.7.1.148	ispE	21
Dshi_3091	159045631	chromosome	2.1.3.2	pyrB	21
Dshi_3094	159045634	chromosome	3.5.2.3	pyrC1	19
Dshi_3097	159045637	chromosome	6.3.2.2	gsh	21
Dshi_3100	159045640	chromosome	2.5.1.-	ubiA	13
Dshi_3100	159045640	chromosome	2.5.1.39	ubiA	4
Dshi_3105	159045645	chromosome	2.7.8.5	pgsA	18
Dshi_3106	159045646	chromosome	5.4.99.12	rluA	13
Dshi_3119	159045659	chromosome	2.3.3.1	gltA1	18
Dshi_3120	159045660	chromosome	2.8.3.16	yfdW2	10
Dshi_3128	159045668	chromosome	3.6.3.20	ugpC5	12
Dshi_3129	159045669	chromosome	3.6.3.20	ugpC1	10
Dshi_3141	159045681	chromosome	3.6.3.20	ugpC3	10
Dshi_3145	159045685	chromosome	4.1.2.20	garL	11
Dshi_3146	159045686	chromosome	6.4.1.2	accA	21
Dshi_3149	159045689	chromosome	3.4.13.22	ddpX	11
Dshi_3150	159045690	chromosome	2.6.1.21	dat	17
Dshi_3165	159045705	chromosome	1.7.99.4	napA	15
Dshi_3171	159045711	chromosome	4.99.1.3	cbiX1	10
Dshi_3172	159045712	chromosome	1.7.2.1	nirN	11
Dshi_3177	159045717	chromosome	1.7.2.1	nirF	10
Dshi_3179	159045719	chromosome	2.1.1.107	nirE	19
Dshi_3190	159045730	chromosome	2.3.1.37	hemA3	21
Dshi_3203	159045743	chromosome	3.5.3.19	allA	17
Dshi_3205	159045745	chromosome	3.5.2.17		9
Dshi_3212	159045752	chromosome	1.7.1.1	NULL	4
Dshi_3228	159045768	chromosome	5.1.1.7	dapF	19
Dshi_3236	159045776	chromosome	4.2.1.1	cynT	17
Dshi_3240	159045780	chromosome	1.2.1.11	asd	17
Dshi_3246	159045786	chromosome	3.6.3.14	fliI	13
Dshi_3268	159045808	chromosome	1.12.98.1		12
Dshi_3275	159045815	chromosome	4.2.3.5	aroC	21
Dshi_3276	159045816	chromosome	1.10.2.2	petC	17
Dshi_3277	159045817	chromosome	1.10.2.2	petB	17
Dshi_3278	159045818	chromosome	1.10.2.2	petA	18
Dshi_3279	159045819	chromosome	2.5.1.18		9
Dshi_3282	159045822	chromosome	1.2.1.2	fdhD	10
Dshi_3289	159045829	chromosome	3.2.2.4	amn	17
Dshi_3294	159045834	chromosome	2.2.1.7	dxs1	21
Dshi_3295	159045835	chromosome	2.5.1.10	ispA	16
Dshi_3301	159045841	chromosome	2.6.1.42	ilvE	19
Dshi_3308	159045848	chromosome	2.5.1.18	gst1	17
Dshi_3313	159045853	chromosome	4.4.1.3	dddL	2
Dshi_3316	159045856	chromosome	3.1.3.3	serB	17
Dshi_3317	159045857	chromosome	2.6.1.52	serC	21
Dshi_3318	159045858	chromosome	1.1.1.95	serA1	17
Dshi_3324	159045864	chromosome	1.1.2.4	dld2	10
Dshi_3325	159045865	chromosome	2.6.1.45	sgaA1	20
Dshi_3329	159045869	chromosome	4.2.1.17		16
Dshi_3330	159045870	chromosome	2.8.3.16	yfdW1	10
Dshi_3331	159045871	chromosome	2.3.1.9	bktB	17
Dshi_3344	159045884	chromosome	2.7.1.39		3
Dshi_3345	159045885	chromosome	2.4.2.11	pncB	21
Dshi_3347	159045887	chromosome	3.5.1.19	pncA	16
Dshi_3350	159045890	chromosome	2.7.9.3	selD	18
Dshi_3368	159045908	chromosome	2.1.1.163	ubiE	15
Dshi_3370	159045910	chromosome	4.2.1.17		19
Dshi_3386	159045926	chromosome	2.7.8.6	wcaJ	10
Dshi_3393	159045933	chromosome	1.1.1.85	leuB	19
Dshi_3400	159045940	chromosome	2.1.1.64	ubiG2	17
Dshi_3414	159045954	chromosome	1.1.1.94	gpsA	19
Dshi_3416	159045956	chromosome	4.2.1.75	hemD	16
Dshi_3420	159045960	chromosome	2.7.1.30	glpK	21
Dshi_3426	159045966	chromosome	3.3.1.1	ahcY	21
Dshi_3427	159045967	chromosome	2.4.1.44	rafI	10
Dshi_3444	159045984	chromosome	3.2.1.-	mltA	13
Dshi_3449	159045989	chromosome	2.7.1.24	coaE	18
Dshi_3450	159045990	chromosome	1.1.1.25	aroE	21
Dshi_3460	159046000	chromosome	1.3.99.22	hemN3	17
Dshi_3462	159046002	chromosome	3.6.1.15	ham1	13
Dshi_3463	159046003	chromosome	2.7.7.56	rph	21
Dshi_3467	159046007	chromosome	1.1.1.40	maeB	21
Dshi_3468	159046008	chromosome	1.8.4.11	msrA1	17
Dshi_3472	159046012	chromosome	6.3.4.5	argG	21
Dshi_3473	159046013	chromosome	4.3.1.19	ilvA	20
Dshi_3474	159046014	chromosome	5.5.1.2	pcaB	18
Dshi_3476	159046016	chromosome	1.13.11.3	pcaG	18
Dshi_3477	159046017	chromosome	1.13.11.3	pcaH	19
Dshi_3478	159046018	chromosome	4.1.1.44	pcaC	16
Dshi_3479	159046019	chromosome	1.14.13.2	pobA	21
Dshi_3483	159046023	chromosome	3.6.3.29	modC	20
Dshi_3492	159046032	chromosome	2.1.1.-	rumA	13
Dshi_3498	159046038	chromosome	4.99.1.1	hemH	21
Dshi_3502	159046042	chromosome	6.6.1.1	bchI	21
Dshi_3503	159046043	chromosome	6.6.1.1	bchD	19
Dshi_3504	159046044	chromosome	6.6.1.1	bchO	12
Dshi_3508	159046048	chromosome	1.14.99.-	crtI	13
Dshi_3509	159046049	chromosome	2.5.1.32	crtB	20
Dshi_3512	159046052	chromosome	4.2.1.131	crtC
Dshi_3513	159046053	chromosome	1.14.99.-	crtD	13
Dshi_3514	159046054	chromosome	2.5.1.29	crtE	20
Dshi_3515	159046055	chromosome	2.1.1.-	crtF	13
Dshi_3516	159046056	chromosome	1.-.-.-	bchC	13
Dshi_3517	159046057	chromosome	1.3.1.33	bchX	6
Dshi_3518	159046058	chromosome	1.3.1.33	bchY	10
Dshi_3519	159046059	chromosome	1.3.1.33	bchZ	10
Dshi_3526	159046066	chromosome	2.2.1.7	dxs2	21
Dshi_3527	159046067	chromosome	5.3.3.2	idi	19
Dshi_3528	159046068	chromosome	1.3.1.83	bchP	15
Dshi_3530	159046070	chromosome	2.5.1.62	bchG	18
Dshi_3533	159046073	chromosome	4.2.1.-	bchF	13
Dshi_3534	159046074	chromosome	1.3.7.7	bchN
Dshi_3535	159046075	chromosome	1.3.7.7	bchB
Dshi_3536	159046076	chromosome	6.6.1.1	bchH	15
Dshi_3537	159046077	chromosome	1.3.7.7	bchL
Dshi_3538	159046078	chromosome	2.1.1.11	bchM	19
Dshi_3544	159046084	chromosome	1.14.13.81	acsF	20
Dshi_3546	159046086	chromosome	2.3.1.37	hemA1	21
Dshi_3550	159046090	chromosome	2.1.1.64	ubiG1	21
Dshi_3553	159046093	chromosome	6.2.1.1	acs	21
Dshi_3554	159046094	chromosome	2.7.4.3	adk1	19
Dshi_3564	159046104	chromosome	3.6.1.-	mutT	13
Dshi_3565	159046105	chromosome	2.3.1.35	argJ	21
Dshi_3565	159046105	chromosome	2.3.1.1	argJ	17
Dshi_3574	159046114	chromosome	3.1.3.7	cysQ	10
Dshi_3575	159046115	chromosome	2.7.7.38	kdsB	18
Dshi_3577	159046117	chromosome	2.7.7.9	galU	20
Dshi_3588	159046128	chromosome	5.3.1.13	yrbH	17
Dshi_3590	159046130	chromosome	1.6.5.3		17
Dshi_3593	159046133	chromosome	3.6.1.27	uppP	19
Dshi_3603	159046145	plasmid1	3.6.3.4		15
Dshi_3609	159046151	plasmid1	3.6.3.3		14
Dshi_3632	159046174	plasmid1	4.4.1.-	DddD
Dshi_3681	159046223	plasmid1	4.1.99.17	ThiC
Dshi_3719	159046259	plasmid1	1.2.99.2		11
Dshi_3720	159046260	plasmid1	1.2.99.2		12
Dshi_3721	159046261	plasmid1	1.2.99.2		11
Dshi_3789	159046328	plasmid1	3.6.3.4		15
Dshi_3801	159046341	plasmid2	1.11.1.6		11
Dshi_3811	159046351	plasmid2	3.7.1.2		14
Dshi_3812	159046352	plasmid2	1.13.11.5		15
Dshi_3817	159046357	plasmid2	2.3.1.16		11
Dshi_3824	159046364	plasmid2	6.2.1.30		11
Dshi_3826	159046366	plasmid2	1.1.1.35		11
Dshi_3830	159046370	plasmid2	1.1.1.94		13
Dshi_3832	159046372	plasmid2	2.4.1.213		15
Dshi_3840	159046380	plasmid2	2.2.1.6		11
Dshi_3841	159046381	plasmid2	1.4.1.4		14
Dshi_3861	159046399	plasmid2	1.1.1.22		15
Dshi_3868	159046406	plasmid2	5.1.3.2		14
Dshi_3877	159046415	plasmid2	4.1.99.17	ThiC
Dshi_3891	159046429	plasmid2	1.9.3.1		14
Dshi_3892	159046430	plasmid2	1.9.3.1		12
Dshi_3898	159046436	plasmid2	3.2.1.20		13
Dshi_3941	159046480	plasmid3	3.6.3.4		15
Dshi_4065	159046603	plasmid3	3.6.3.4		15
Dshi_4080	159046614	plasmid4	4.1.99.17	ThiC
Dshi_4114	159046643	plasmid4	5.1.3.13		12
Dshi_4115	159046644	plasmid4	4.2.1.46		11
Dshi_4117	159046646	plasmid4	1.1.1.133		13
Dshi_4118	159046647	plasmid4	2.7.7.24		14
Dshi_4139	159046662	plasmid4	4.2.1.47		15
Dshi_4142	159046665	plasmid4	1.1.1.271		14
Dshi_4146	159046669	plasmid4	5.3.1.8		14
Dshi_4160	159046683	plasmid5	1.3.1.33		14
Dshi_4194	159046717	plasmid5	2.3.2.2		11
Dshi_4200	159046723	plasmid5	1.2.99.2		12
Dshi_4201	159046724	plasmid5	1.2.99.2		11
Dshi_4202	159046725	plasmid5	1.2.99.2		11
Dshi_4206	159046729	plasmid5	2.6.1.42		12
Dshi_4221	159046744	plasmid5	1.1.1.60		10
Dshi_5004	284928597	chromosome	1.1.1.28		14
Dshi_5008	284928600	chromosome	4.3.1.17		10
